# Supplementary material
Source: publisher figshare collection journal article supplement (https://gsapubs.figshare.com/articles/dataset/_/15078957)
Supplement: Supplementary file 1 [file 1]

Whittington, A.G., and Sehlke, A., 2021, Spontaneous reheating of crystallizing lava: *Geology*, v. 49, <https://doi.org/10.1130/G49148.1>

### Supplementary Information

**SI Table 1.** Excel spreadsheet. Electron microprobe analyses of phases from FLIR experiments. and from DSC experiments pyx 150714 and kom 151021. Data obtained on a JEOL JXA-8200 at Washington University in St. Louis, using five wavelength dispersive spectrometers (WDS), calibrated using oxide and silicate standards, with data corrected using CITZAF. Analyses were made using a 20  $\mu\text{m}$  beam diameter, 15 kV accelerating potential, and 25 nA beam current.

**SI Table 2.** Summary of DSC experiments and thermodynamic data.  $\Delta H^{\text{xtal}}\uparrow$  indicates enthalpy released by crystallization during heating,  $\Delta H^{\text{fus}}$  indicates enthalpy absorbed by melting during heating, and  $\Delta H^{\text{xtal}}\downarrow$  indicates enthalpy released by crystallization during cooling.

| Run date            | Sample                                       | Weight<br>(mg) | Cooling rate<br>(°C/min) | $\Delta H^{\text{xtal}}\downarrow$<br>(J/g) | Peak 1<br>(°C) | Peak 2<br>(°C) |
|---------------------|----------------------------------------------|----------------|--------------------------|---------------------------------------------|----------------|----------------|
| 150227              | $\text{Fe}_{0.4}\text{Mg}_{0.6}\text{SiO}_3$ | 42.7           | 100                      | -472                                        | 1313           | 1273           |
| 150714              | $\text{Fe}_{0.4}\text{Mg}_{0.6}\text{SiO}_3$ | 46.4           | 50                       | -418                                        | 1316           | 1264           |
| 150826              | $\text{Fe}_{0.4}\text{Mg}_{0.6}\text{SiO}_3$ | 44.6           | 50                       | -484                                        | 1355           | 1281           |
| 160121 <sup>a</sup> | $\text{Fe}_{0.4}\text{Mg}_{0.6}\text{SiO}_3$ | 28.9           | 50                       | -439                                        | 1346           | 1279           |
| 150309              | Komatiite                                    | 32.5           | 100                      | -291                                        | 1121           | 1069           |
| 150617              | Komatiite                                    | 23.9           | 100                      | >-233 <sup>b</sup>                          | 1126           | 1076           |
| 150828 <sup>c</sup> | Komatiite                                    | 49.8           | 50                       | -293                                        | 1138           | 1080           |
| 151021              | Komatiite                                    | 53.6           | 50                       | -272                                        | 1139           | 986            |

<sup>a</sup> additional peak at 1353°C during cooling

<sup>b</sup> data collection stopped at 900°C, underestimating  $\Delta H^{\text{xtal}}$  by ~5-10 J/g

<sup>c</sup> additional peaks at 1179°C and 1035°C during cooling

**SI Movie 1.** Crystallizing pyroxene melts of composition  $\text{Fe}_{0.3}\text{Mg}_{0.7}\text{SiO}_3$  and  $\text{Fe}_{0.4}\text{Mg}_{0.6}\text{SiO}_3$  recorded with an iPhone 5 in real time.

**SI Movie 2.** Crystallizing pyroxene melts of composition  $\text{Fe}_{0.4}\text{Mg}_{0.6}\text{SiO}_3$  recorded with a FLIR T650sc. Crystallization occurs between 7s and 15s.

**SI Movie 3.** Crystallizing melts of komatiite composition recorded with a FLIR T650sc. Crystallization occurs between 7s and 9s.

**SI Movie 4.** Crystallizing melts of komatiite composition recorded with a FLIR T650sc, the same experiment as shown in movie S3 but processed to show the temperature change over a 10-frame (0.3s) interval.
