# Supplementary material
Source: publisher figshare collection journal article supplement (https://gsapubs.figshare.com/articles/dataset/_/15078957)
Supplement: Supplementary file 1 [file 1]

## Sheet: Whittington & Sehlke supp data
Type of experiment			FLIR		FLIR		FLIR		DSC		DSC		DSC			Type of experiment			FLIR		FLIR		FLIR		DSC		DSC		DSC							Putirka 2008
Starting melt	Pyroxene		Pyroxene		Pyroxene		Pyroxene		Pyroxene		Pyroxene		Pyroxene			Starting melt	Komatiite		Komatiite		Komatiite		Komatiite		Komatiite		Komatiite		Komatiite							Control Calculation
Phase	Starting Glass		Bronzite		Ferrosilite		Ferrosilite		Bronzite		Ferrosilite		Trydimite			Phase	Starting Glass		Pigeonite		Augite		Spinel		Glass		Augite		Olivine
	wt%	1σ (n = 6)	wt%	1σ (n = 13)	wt%	1σ (n = 7)	wt%	1σ (n = 4)	wt%	1σ (n = 8)	wt%	1σ (n = 6)	wt%	1σ (n = 2)			wt%	1σ (n = 4)	wt%	1σ (n = 4)	wt%	1σ (n = 3)	wt%	1σ (n = 3)	wt%	1σ (n = 2)	wt%	(n = 1)	wt%	1σ (n = 4)
SiO2	52.43	0.7	55.8631	0.422199	42.9543	1.87355	46.2225	1.61922	54.0513	1.20137	43.27	0.863342	97.315	0.205061		SiO2	49.65	0.22	50.595	0.715379	49.9767	0.737857	3.25667	0.745274	52.7403	0.219981	50.6246	na	40.7603	0.336561						55.7
TiO2	nm	nm	0.02	0.00960769	0.0428571	0.0103016	0.025	0.005	0.0075	0.00886405	0.0516667	0.022286	0.02	0		TiO2	0.36	0.02	0.3525	0.0221736	0.373333	0.0057735	0.216667	0.0288675	0.512589	0.035204	0.511016	na	0.026371	0.0173812						0.03
Al2O3	0.56	0.02	0.38	0.0575125	0.742857	0.103608	0.6025	0.101088	0.07625	0.0413824	0.518333	0.0785918	0.28	0.0141421		Al2O3	10.47	0.05	9.6	0.714983	10.4267	1.0586	9.92333	0.297041	13.8305	0.172605	12.1751	na	0.239403	0.0762073						1.88
Cr2O3	nm	nm	0.0115385	0.0123077	0.0142857	0.0117803	0.005	0.00866025	0.005	0.00755929	0.0533333	0.0196638	0.005	0.00707107		Cr2O3	0.17	0.02	0.1775	0.0877021	0.13	0.052915	20.02	2.1308	0.184584	0.0053825	0.244832	na	0.257811	0.0267015						0
FeO	24.39	0.43	13.8869	1.13815	48.9286	2.28595	41.375	3.43475	14.4275	1.23316	49.4217	1.33605	1.71	0.296985		FeO	10.92	0.13	9.1725	0.335596	11.4433	0.872143	46.4967	3.48684	11.2215	0.0422143	12.7067	na	10	1.08911						13.82
MnO	nm	nm	0.00384615	0.00624926	0.00571429	0.00903508	0.0025	0.00433013	0.005	0.00534522	0.00166667	0.00408248	0.005	0.00707107		MnO	0.11	0.03	0.135	0.0057735	0.12	0.02	0.206667	0.0288675	0.108434	0.00947028	0.160068	na	0.121162	0.0175574						0
MgO	20.93	0.15	31.5685	0.856521	2.97571	0.411161	7.6875	1.84892	31.3675	1.26338	1.58833	0.517935	0.255	0.0636396		MgO	17.03	0.06	22.42	1.52134	13.8967	2.16625	12.97	0.536749	6.24216	0.00496389	8.55314	na	47.8881	1.45777						27.7
CaO	0.03	0.01	0.00153846	0.00360801	0.0157143	0.0345821	0.0025	0.00433013	0	0	0.00166667	0.00408248	0	0		CaO	9.46	0.13	7.7	0.650487	12.7967	0.263122	0.666667	0.140475	12.9067	0.0159806	15.2014	na	0.328655	0.12198						1.47
Na2O	0.09	0.01	0.00153846	0.00360801	0.0128571	0.00880631	0.005	0.00866025	0.00375	0.00744024	0	0	0.015	0.00707107		Na2O	0.43	0.02	0.225	0.0574456	0.406667	0.151438	0.0466667	0.0251661	0.464246	0.0165675	0.358584	na	0.008143	0.0143613						0.44
K2O	nm	nm	0.00615385	0.00835598	0.142857	0.0211891	0.12	0.00707107	0.0425	0.0158114	0.0716667	0.0116905	0.15	0		K2O	0.14	0.02	0.0875	0.0275379	0.173333	0.0493288	0.0266667	0.0057735	0.189129	0.00519794	0.161039	na	0.002268	0.00596368						0
P2O5	nm	nm	0.0207692	0.014391	0.0171429	0.0138505	0.0125	0.0163936	0.03875	0.00991031	0.00333333	0.00516398	0.005	0.00707107		P2O5	0.04	0.02	0.045	0.0057735	0.0333333	0.011547	0.00333333	0.0057735	0.0633685	0.0303653	0.09353	na	0.0374865	0.0354651						0
Sum	98.43	1.32	101.764	0.342533	95.8529	1.17086	96.06	0.864682	100.025	0.774518	94.9817	0.954694	99.76	0.452548		Sum	98.78	0.71	100.51	0.372916	99.7767	1.29116	93.8333	1.61168	98.4635	0.386575	100.79	na	99.6697	0.708072						101.04
Mole proportions																Mole proportions
SiO2	0.872606		0.929744		0.714899		0.769293		0.899589		0.720154		1.61964			SiO2	0.826338		0.842066		0.831775		0.0542015		0.877771		0.842558		0.678385							0.927029
TiO2	nm		0.000250419		0.000536613		0.000313024		9.39073e-05		0.000646917		0.000250419			TiO2	0.00450755		0.00441364		0.0046745		0.00271288		0.00641811		0.00639842		0.000330191							0.000375629
Al2O3	0.00549228		0.0037269		0.00728567		0.0059091		0.000747832		0.00508362		0.00274614			Al2O3	0.102686		0.0941533		0.102261		0.0973244		0.135644		0.119409		0.00234798							0.0184384
Cr2O3	nm		7.59157e-05		9.39909e-05		3.28968e-05		3.28968e-05		0.000350899		3.28968e-05			Cr2O3	0.00111849		0.00116784		0.000855317		0.131719		0.00121445		0.00161084		0.00169623							0
FeO	0.339483		0.193291		0.681033		0.575896		0.200815		0.687897		0.0238014			FeO	0.151995		0.127671		0.159279		0.647184		0.156191		0.176864		0.13919							0.19236
MnO	nm		5.42189e-05		8.05538e-05		3.52423e-05		7.04846e-05		2.34949e-05		7.04846e-05			MnO	0.00155066		0.00190308		0.00169163		0.00291336		0.00152858		0.00225647		0.00170801							0
MgO	0.519298		0.783251		0.073831		0.190736		0.778265		0.0394084		0.00632685			MgO	0.422535		0.556267		0.344793		0.321801		0.154875		0.212214		1.18816							0.68727
CaO	0.000534971		2.74344e-05		0.000280223		4.45809e-05		0		2.97206e-05		0			CaO	0.168694		0.137309		0.228195		0.0118882		0.230157		0.271077		0.0058607							0.0262136
Na2O	0.00145211		2.48223e-05		0.000207444		8.06725e-05		6.05044e-05		0		0.000242018			Na2O	0.00693784		0.00363026		0.00656137		0.000752944		0.00749038		0.00578558		0.000131383							0.00709918
K2O	nm		6.53302e-05		0.00151659		0.00127394		0.000451187		0.000760825		0.00159242			K2O	0.00148626		0.000928914		0.00184013		0.000283098		0.00200782		0.00170962		2.40774e-05							0
P2O5	nm		0.000214179		0.000176782		0.000128904		0.000399602		3.43744e-05		5.15616e-05			P2O5	0.000412492		0.000464054		0.000343744		3.43744e-05		0.000653476		0.00096451		0.000386572							0
Sum	1.73887		1.91072		1.47994		1.54374		1.88053		1.45439		1.65475			Sum	1.68826		1.76997		1.68227		1.27081		1.57395		1.64085		2.01822							1.85879
Mole fractions																Mole fractions
SiO2	0.501825		0.486592		0.483059		0.49833		0.478371		0.495159		0.97878			SiO2	0.489461		0.47575		0.494436		0.042651		0.557686		0.51349		0.33613							0.498729
TiO2	nm		0.00013106		0.000362591		0.00020277		4.99367e-05		0.000444803		0.000151333			TiO2	0.00266994		0.00249362		0.00277869		0.00213475		0.00407771		0.00389946		0.000163605							0.000202083
Al2O3	0.00315854		0.00195052		0.00492295		0.00382777		0.000397672		0.00349537		0.00165955			Al2O3	0.0608235		0.0531947		0.0607875		0.0765843		0.0861806		0.0727728		0.00116339							0.00991957
Cr2O3	nm		3.97314e-05		6.35099e-05		2.13098e-05		1.74934e-05		0.000241269		1.98802e-05			Cr2O3	0.000662511		0.000659804		0.000508431		0.103649		0.00077159		0.000981712		0.00084046							0
FeO	0.195232		0.101161		0.460176		0.373052		0.106787		0.47298		0.0143836			FeO	0.0900304		0.0721318		0.094681		0.509267		0.0992347		0.107788		0.0689667							0.103487
MnO	nm		2.83761e-05		5.44304e-05		2.28291e-05		3.74813e-05		1.61545e-05		4.25952e-05			MnO	0.000918496		0.0010752		0.00100556		0.00229252		0.000971173		0.00137518		0.000846298							0
MgO	0.298642		0.409923		0.0498878		0.123554		0.413855		0.0270962		0.00382344			MgO	0.250278		0.31428		0.204957		0.253224		0.0983991		0.129332		0.588717							0.369741
CaO	0.000307655		1.43581e-05		0.000189347		2.88785e-05		0		2.04351e-05		0			CaO	0.0999219		0.077577		0.135647		0.00935482		0.146229		0.165206		0.00290389							0.0141025
Na2O	0.000835088		1.2991e-05		0.00014017		5.22577e-05		3.21742e-05		0		0.000146256			Na2O	0.00410946		0.00205103		0.00390031		0.000592489		0.00475897		0.00352597		6.50986e-05							0.00381926
K2O	nm		3.41913e-05		0.00102477		0.000825227		0.000239926		0.000523123		0.000962333			K2O	0.000880351		0.000524818		0.00109384		0.000222769		0.00127565		0.00104191		1.193e-05							0
P2O5	nm		0.000112093		0.000119452		8.35009e-05		0.000212495		2.36349e-05		3.11597e-05			P2O5	0.00024433		0.000262181		0.000204333		2.70491e-05		0.000415182		0.000587813		0.000191541							0
Sum	1		1		1		1		1		1		1			Sum	1		1		1		1		1		1		1							1
Number of anions																Number of anions
X Si	1.74521		1.85949		1.4298		1.53859		1.79918		1.44031		3.23928			X Si	1.65268		1.68413		1.66355		0.108403		1.75554		1.68512		1.35677							1.85406
X Ti	nm		0.000500839		0.00107323		0.000626049		0.000187815		0.00129383		0.000500839			X Ti	0.0090151		0.00882729		0.00934899		0.00542575		0.0128362		0.0127968		0.000660381							0.000751258
X Al	0.0164768		0.0111807		0.021857		0.0177273		0.0022435		0.0152509		0.00823841			X Al	0.308058		0.28246		0.306783		0.291973		0.406932		0.358227		0.00704393							0.0553151
X Cr	nm		0.000227747		0.000281973		9.86904e-05		9.86904e-05		0.0010527		9.86904e-05			X Cr	0.00335548		0.00350351		0.00256595		0.395157		0.00364334		0.00483252		0.0050887							0
X Fe	0.339483		0.193291		0.681033		0.575896		0.200815		0.687897		0.0238014			X Fe	0.151995		0.127671		0.159279		0.647184		0.156191		0.176864		0.13919							0.19236
X Mn	nm		5.42189e-05		8.05538e-05		3.52423e-05		7.04846e-05		2.34949e-05		7.04846e-05			X Mn	0.00155066		0.00190308		0.00169163		0.00291336		0.00152858		0.00225647		0.00170801							0
X Mg	0.519298		0.783251		0.073831		0.190736		0.778265		0.0394084		0.00632685			X Mg	0.422535		0.556267		0.344793		0.321801		0.154875		0.212214		1.18816							0.68727
X Ca	0.000534971		2.74344e-05		0.000280223		4.45809e-05		0		2.97206e-05		0			X Ca	0.168694		0.137309		0.228195		0.0118882		0.230157		0.271077		0.0058607							0.0262136
X Na	0.00290421		4.96446e-05		0.000414887		0.000161345		0.000121009		0		0.000484035			X Na	0.0138757		0.00726053		0.0131227		0.00150589		0.0149808		0.0115712		0.000262767							0.0141984
X K	nm		0.00013066		0.00303319		0.00254788		0.000902373		0.00152165		0.00318485			X K	0.00297252		0.00185783		0.00368027		0.000566195		0.00401564		0.00341923		4.81549e-05							0
X P	nm		0.00107089		0.000883912		0.000644519		0.00199801		0.000171872		0.000257808			X P	0.00206246		0.00232027		0.00171872		0.000171872		0.00326738		0.00482255		0.00193286							0
Sum	2.62391		2.84927		2.21257		2.3271		2.78388		2.18696		3.28224			Sum	2.73679		2.81351		2.73473		1.78699		2.74397		2.7432		2.70672							2.83017
Number of oxygen	3		3		3		3		3		3		2			Number of oxygen	3		3		3		4		3		3		4							6
Oxygen renormalization factor (ORF)	1.14333		1.0529		1.35589		1.28916		1.07763		1.37177		0.60934			Oxygen renormalization factor (ORF)	1.09618		1.06628		1.097		2.2384		1.09331		1.09361		1.4778							2.12002
																																				#cations per #oxygen
Cations in formula																Cations in formula
Si	0.997679		0.978928		0.969325		0.991739		0.969426		0.987885		0.98691			Si	0.905811		0.897881		0.912458		0.121325		0.959673		0.921434		1.00252							1.96532
Ti	nm		0.000263667		0.000727589		0.000403537		0.000101198		0.000887421		0.000152591			Ti	0.00494106		0.00470619		0.00512793		0.00607251		0.00701697		0.0069974		0.000487956							0.00079634
Al	0.012559		0.00784811		0.0197571		0.0152355		0.00161178		0.0139471		0.00334666			Al	0.225124		0.200788		0.224361		0.435702		0.296601		0.261175		0.00693968							0.0781792
Cr	nm		0.000159863		0.000254883		8.48183e-05		7.09014e-05		0.000962706		4.00907e-05			Cr	0.00245213		0.00249049		0.00187657		0.589679		0.00265552		0.00352327		0.00501339							0
Fe	0.388142		0.203516		0.923407		0.74242		0.216405		0.943636		0.0145031			Fe	0.166613		0.136134		0.174729		1.44866		0.170764		0.193421		0.205695							0.407806
Mn	nm		5.70871e-05		0.000109222		4.54328e-05		7.59565e-05		3.22295e-05		4.29491e-05			Mn	0.0016998		0.00202923		0.00185572		0.00652128		0.0016712		0.0024677		0.00252411							0
Mg	0.59373		0.824686		0.100107		0.245889		0.838684		0.0540593		0.0038552			Mg	0.463172		0.593138		0.378238		0.72032		0.169326		0.23208		1.75586							1.45702
Ca	0.00061165		2.88857e-05		0.000379952		5.74718e-05		0		4.07698e-05		0			Ca	0.184918		0.146411		0.25033		0.0266107		0.251632		0.296454		0.00866094							0.0555732
Na	0.00332048		5.22709e-05		0.000562542		0.000207999		0.000130403		0		0.000294942			Na	0.0152102		0.00774178		0.0143957		0.00337078		0.0163786		0.0126544		0.000388317							0.0301008
K	nm		0.000137572		0.00411267		0.00328461		0.000972427		0.00208735		0.00194065			K	0.00325841		0.00198097		0.00403726		0.00126737		0.00439032		0.00373932		7.11633e-05							0
P	nm		0.000451018		0.000479395		0.000332355		0.000861248		9.43074e-05		6.2837e-05			P	0.000904328		0.000989626		0.000754175		0.000153887		0.0014289		0.00210961		0.00114255							0
Sum of cations	1.99604		2.01613		2.01922		1.9997		2.02834		2.00363		1.01115			Sum of cations	1.9741		1.99429		1.96816		3.35968		1.88154		1.93606		2.9893							3.9948
Mg#	0.604316		0.801999		0.0977603		0.248772		0.794837		0.0541802		0.209507			Mg#	0.567332		0.675778		0.469772		0.327105		0.285352		0.320366		0.890062							6
Ca#	0.000622555		2.80911e-05		0.000371046		5.81456e-05		0		4.0861e-05		0			Ca#	0.226504		0.166809		0.31091		0.0120842		0.424056		0.409228		0.0043903
NBO/T	1.93591		2.07532		2.05307		1.95044		2.17229		1.97544		0.0359952			NBO/T	1.25069		1.41235		1.22615		2.93506		0.717487		1.00621		3.87602							11.9453

## Sheet: Analytical conditions
Electron microprobe analyses of phases from FLIR experiments, and from DSC experiments pyx 150714 and kom 151021.
Data obtained on a JEOL JXA-8200 at Washington University in St. Louis, using five wavelength dispersive spectrometers (WDS).
Microprobe calibrated using oxide and silicate standards, with data corrected using CITZAF.
Analyses were made using a 20 μm beam diameter, 15 kV accelerating potential, and 25 nA beam current.

## Sheet: G49148
Whittington, A.G., and Sehlke, A., 2021, Spontaneous reheating of crystallizing lava: Geology, v. 49, https://doi.org/10.1130/G49148.1
